# Supplementary material
Source: PubMed Central journal article supplement (PMC2288716)
Supplement: blood_blood-2007-08-106021_1.pdf [file blood_blood-2007-08-106021_1.pdf]

|                                                      |                                                                                    |
|------------------------------------------------------|------------------------------------------------------------------------------------|
| University of California-San Francisco, CA           | Robert Goldsby, M.D.*<br>Arthur Ablin, M.D.†                                       |
| University of Alabama, Birmingham, AL                | Roger Berkow, M.D.*                                                                |
| International Epidemiology Institute, Rockville, MD  | John Boice, Sc.D.‡                                                                 |
| University of Washington, Seattle, WA                | Norman Breslow, Ph.D.‡                                                             |
| UT-Southwestern Medical Center at Dallas, TX         | Gail Tomlinson, M.D.* ,<br>Geroge R. Buchanan, M.D.†                               |
| Cincinnati Children's Hospital Medical Center        | Stella Davies, M.D., Ph.D.‡                                                        |
| Dana-Farber Cancer Institute, Boston, MA             | Lisa Diller, M.D.* ,<br>Holcombe Grier, M.D.†<br>Frederick Li, M.D.‡               |
| Texas Children's Center, Houston, TX                 | Zoann Dreyer, M.D.*                                                                |
| Children's Hospital and Medical Center, Seattle, WA  | Debra Friedman, M.D., MPH*<br>Thomas Pendergrass, M.D.†                            |
| Roswell Park Cancer Institute, Buffalo, NY           | Daniel M. Green, M.D.*‡                                                            |
| Hospital for Sick Children, Toronto, ON              | Mark Greenberg, MB, ChB*                                                           |
| St. Louis Children's Hospital, MO                    | Robert Hayashi, M.D.*<br>Teresa Vietti, M.D.†                                      |
| St. Jude Children's Research Hospital, Memphis, TN   | Leslie L. Robison, Ph.D.*‡<br>Melissa Hudson, M.D.*‡                               |
| University of Michigan, Ann Arbor, MI                | Raymond Hutchinson, M.D.*                                                          |
| Stanford University School of Medicine, Stanford, CA | Neyssa Marina, M.D.*<br>Michael P. Link, M.D.†<br>Sarah S. Donaldson, M.D.‡        |
| Emory University, Atlanta, GA                        | Lillian Meacham, M.D.*                                                             |
| Children's Hospital of Philadelphia, PA              | Anna Meadows, M.D.*‡<br>Bobbie Bayton†                                             |
| Children's Hospital, Oklahoma City, OK               | John Mulvihill, M.D.‡                                                              |
| Children's Hospital, Denver, CO                      | Brian Greffe*<br>Lorrie Odom, M.D.†                                                |
| Children's Hospitals and Clinics of Minnesota        | Joanna Perkins, M.D.*<br>Maura O'Leary, M.D.†                                      |
| Columbus Children's Hospital, OH                     | Amanda Termuhlen, M.D.*<br>Frederick Ruymann, M.D.†<br>Stephen Qualman, M.D.‡      |
| Children's National Medical Center, Washington, DC   | Gregory Reaman, M.D.*<br>Roger Packer, M.D.‡                                       |
| Children's Hospital of Pittsburgh, PA                | A. Kim Ritchey, M.D.*<br>Julie Blatt, M.D.†                                        |
| University of Minnesota, Minneapolis, MN             | Ann Mertens, Ph.D.*‡<br>Joseph Neglia, M.D.*<br>MPH†, Mark Nesbit, MD‡             |
| Children's Hospital Los Angeles, CA                  | Kathy Ruccione, RN, MPH*                                                           |
| Memorial Sloan-Kettering Cancer Center New York      | Charles Sklar, M.D.*‡<br>Kevin Oeffinger, M.D.‡                                    |
| National Cancer Institute, Bethesda, MD              | Barry Anderson, M.D.‡<br>Peter Inskip, Sc.D.‡                                      |
| Mayo Clinic, Rochester, MN                           | Vilmarie Rodriguez, M.D.*<br>W. Anthony Smithson, M.D.*<br>Gerald Gilchrist, M.D.† |
| U.T.M.D. Anderson Cancer Center, Houston, TX         | Louise Strong, M.D.*‡<br>Marilyn Stovall, Ph.D.‡                                   |
| Riley Hospital for Children, Indianapolis, IN        | Terry A. Vik, M.D.*<br>Robert Weetman, M.D.†                                       |
| Fred Hutchinson Cancer Research Center, Seattle, WA  | Wendy Leisenring, Sc.D.*‡<br>John Potter, M.D., Ph.D.†‡                            |
| University of Alberta, Edmonton, AB                  | Yutaka Yasui, Ph.D.†‡                                                              |
| University of California-Los Angeles, CA             | Lonnie Zeltzer, M.D.*‡                                                             |

\* Institutional Principal Investigator

† Former Institutional Principal Investigator

‡ Member CCSS Steering Committee
